# Supplementary material for: Establishment of SLC15A1/PEPT1-Knockout Human-Induced Pluripotent Stem Cell Line for Intestinal Drug Absorption Studies
Source: PubMed Central journal article supplement — Mol Ther Methods Clin Dev. 2019 Nov 21;17:49–57. doi: 10.1016/j.omtm.2019.11.008 (PMC6926248; doi:10.1016/j.omtm.2019.11.008), 2019-11-21
Supplement: mmc1.pdf [file mmc1.pdf]

**OMTM, Volume 17**

**Supplemental Information**

**Establishment of SLC15A1/PEPT1-Knockout**

**Human-Induced Pluripotent Stem Cell Line**

**for Intestinal Drug Absorption Studies**

**Kanae Kawai, Ryosuke Negoro, Moe Ichikawa, Tomoki Yamashita, Sayaka Deguchi, Kazuo Harada, Kazumasa Hirata, Kazuo Takayama, and Hiroyuki Mizuguchi**

## Figure S1

| Clone number                  | 1 <sup>st</sup> allele                      | 2 <sup>nd</sup> allele | PEPT1 knockout |
|-------------------------------|---------------------------------------------|------------------------|----------------|
| No. 1<br>(used in this study) | EF1 $\alpha$ -PuroR-pA<br>cassette knock-in | 29 bp deletion         | ✓              |
| No. 2                         | EF1 $\alpha$ -PuroR-pA<br>cassette knock-in | 120 bp insertion       | ✓              |
| No. 3                         | EF1 $\alpha$ -PuroR-pA<br>cassette knock-in | 53 bp deletion         | ✓              |
| No. 4                         | EF1 $\alpha$ -PuroR-pA<br>cassette knock-in | 2 bp deletion          | ✓              |
| No. 5                         | EF1 $\alpha$ -PuroR-pA<br>cassette knock-in | 9 bp deletion          | ✓              |

### Supplemental figure 1 Establishment efficiency of PEPT1-KO iPS-IEC

Genotyping and sequencing analyses were performed in five Puro-resistant iPS cell clones (No.1-No5).

## Supplemental Materials and Methods

### Donor plasmids (PEPT1)

To knock-in the EF1 $\alpha$ -PuroR-pA (elongation factor 1 alpha promoter followed by puromycin-resistance gene and polyadenylation sequence) cassette into the *PEPT1* locus, a donor template plasmid was generated. The donor template plasmid was generated by conjugating the following four fragments: two homology arms (PEPT1: 0.93 kb for the 3' arm and 1.00 kb for the 5' arm), an EF1 $\alpha$ -PuroR-pA cassette and linearized backbone plasmids (pENTR donor plasmids). The backbone plasmids were the kind gift of Dr. Akitsu Hotta (Center for iPS Cell Research and Application, Kyoto University). In the all experiments, we used the PEPT1 donor plasmid which have two homology arms. Full sequences of PEPT1 donor plasmid are shown below.

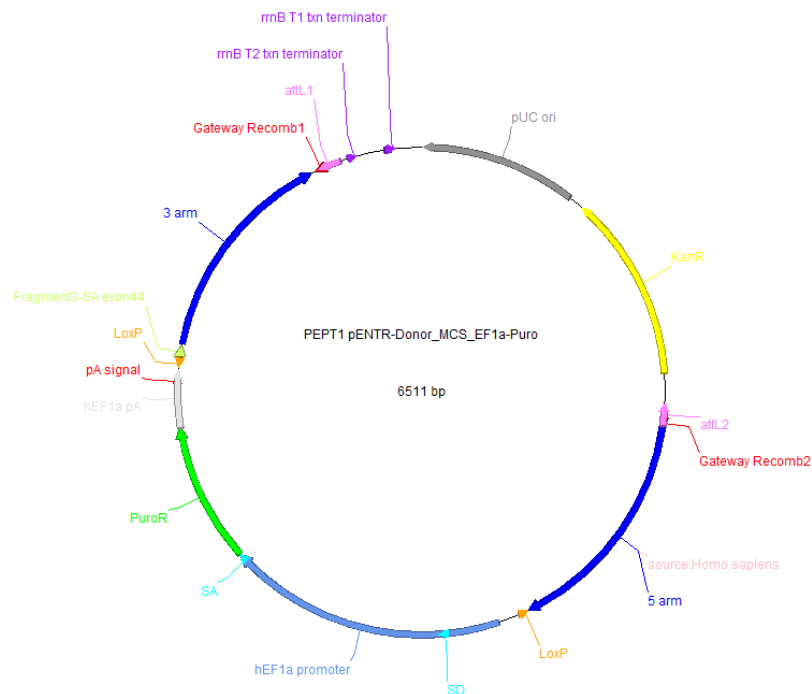

### PEPT1 donor plasmid:

```
AACATGTGAGCAAAAGGCCAGCAAAAGGCCAGGAACCGTAAAAAGGCCGCGTTGCTGG
CGTTTTTCCATAGGCTCCGCCCCCTGACGAGCATCACAAAATCGACGCTCAAGTCAGA
GGTGGCGAAACCCGACAGGACTATAAAGATACCAGGCGTTTCCCCCTGGAAGCTCCCTC
GTGCGCTCTCCTGTTCCGACCCTGCCGTTACCGGATACCTGTCCGCCTTCTCCCTTCGG
GAAGCGTGGCGCTTCTCATAGCTCACGCTGTAGGTATCTCAGTTCGGTGTAGGTCGTT
GCTCCAAGCTGGGCTGTGTGCACGAACCCCCGTTTCAGCCCGACCGCTGCGCCTTATCC
GGTAACTATCGTCTTGAGTCCAACCCGGTAAGACACGACTTATCGCCACTGGCAGCAGCC
ACTGGTAACAGGATTAGCAGAGCGAGGTATGTAGGCGGTGCTACAGAGTTCTTGAAGTG
```

GTGGCCTAACTACGGCTACACTAGAAGAACAGTATTTGGTATCTGCGCTCTGCTGAAGCC  
AGTTACCTTCGGAAAAAGAGTTGGTAGCTCTTGATCCGGCAAACAAACCACCGCTGGTA  
GCGGTGGTTTTTTTTGTTTGCAAGCAGCAGATTACGCGCAGAAAAAAGGATCTCAAGAA  
GATCCTTTGATCTTTTCTACGGGGTCTGACGCTCAGTGGAACGGGGCCCAATCTGAATAA  
TGTTACAACCAATTAACCAATTCTGATTAGAAAACTCATCGAGCATCAAATGAAACTGC  
AATTTATTATCATATCAGGATTATCAATACCATATTTTTGAAAAAGCCGTTTCTGTAATGAAGG  
AGAAAACTCACCGAGGCAGTTCCATAGGATGGCAAGATCCTGGTATCGGTCTGCGATTCC  
GACTCGTCCAACATCAATACAACCTATTAATTTCCCCTCGTCAAAAATAAGGTTATCAAGT  
GAGAAATCACCATGAGTGACGACTGAATCCGGTGAGAATGGCAAAAGTTTATGCATTTCT  
TTCCAGACTTGTTCAACAGGCCAGCCATTACGCTCGTCATCAAATCACTCGCATCAACC  
AAACCGTTATTCATTCGTGATTGCGCCTGAGCGAGACGAAATACGCGATCGCTGTTAAAA  
GGACAATTACAAACAGGAATCGAATGCAACCGGCGCAGGAACACTGCCAGCGCATCAAC  
AATATTTTACCTGAATCAGGATATTCTTCTAATACCTGGAATGCTGTTTTTCCGGGGATCG  
CAGTGGTGAGTAACCATGCATCATCAGGAGTACGGATAAAATGCTTGATGGTCGGAAGAG  
GCATAAATCCGTCAGCCAGTTTAGTCTGACCATCTCATCTGTAACATCATTGGCAACGCT  
ACCTTTGCCATGTTTCAGAAACAACCTCTGGCGCATCGGGCTTCCCATAACAAGCGATAGAT  
TGTCGCACCTGATTGCCCCGACATTATCGCGAGCCCATTATACCCATATAAATCAGCATCCA  
TGTTGGAATTTAATCGCGGCCTCGACGTTTCCCGTTGAATATGGCTCATAACACCCCTTGT  
ATTACTGTTTATGTAAGCAGACAGTTTTATTGTTTCATGATGATATATTTTTATCTTGTGCAAT  
GTAACATCAGAGATTTTGAGACACGGGCCAGAGCTGCAGCTGGATGGCAAATAATGATTT  
TATTTGACTGATAGTGACCTGTTTCGTTGCAACAAATTGATAAGCAATGCTTCTTATAATG  
CCAACCTTGTACAAGAAAGCTGGGTCTAGAGCATGCtcacttttgtctttattcttagaaatattctgaaaacatct  
taaactcctcaaaataggagattgcccactcagtgcatgtactgtgacctagaatatattctctagttcagttacaagacagatggtttct  
gtttcagattgtaatactttaacgagctcatcaccatcacaatgagtgggaaagttaagcaaacatcagcagctacaatgccagcacataccag  
tttttctctgcatgtaagtaccgagactgaatgctcactcaaggtcaagaattttcttaaaaaatgcattgaaattttaatgccaagaatgtt  
aaccaatafattctttatgatagaaaaggctcacaataagctcaacagagattccgccacaatgtcaacctaattcaactttctacttgaatt  
ggtagtcttatacctatatagccaaggaaggttagtaactcgttcattgtatcagaagatctgctcactcagttgatgaagactcacaaca  
cttagacataatatgatttaactagagtatattagatctgtatttaaatgggcttagaattaattgcttggtcaattcttaacttattgatgactaat  
cattagaatctaaacagactgactcccctggataataattatgttaaccaatatctgatgcctcctctagactattaacatggacttaaagaactcat  
agttcaagagagggcagtggttaaaatgactccaacctactctcttatctaaaagaaaaatcctcctgaacgtgtcttcaatcccattgcaagt  
aaaatgcagtggtccttatgttaaaatgtgtacttgcacaaatcatatgatgtaacctaagaaggtcaaacctaatttacctgttcaacagtttt  
atttagaagctatctcaactctctgttttgcctactgctAAGCTTATAACTTCGTATAATGTATGCTATAACGAAGT  
TATCAATTGGCGGCCCTAGAAAGTATAGGAACTTCATTCTACCGGGTAGGGGAGGGCGCTT  
TTCCCAAGGCAGTCTGGAGCGCTAGGTCTTGAAAGGAGTGGGAATTGGCTCCGGTGGCC  
GTCAGTGGGCAGAGCGCACATCGCCACAGTCCCCGAGAAGTTGGGGGGAGGGGTCCG  
CAATTGAACCGGTGCCTAGAGAAGGTGGCGCGGGGTAAACTGGGAAAGTGATGTCGTGT

ACTGGCTCCGCCTTTTTCCCGAGGGTGGGGGAGAACCGTATATAAGTGCAGTAGTCGCCG  
TGAACGTTCTTTTTCGCAACGGGTTTGCCGCCAGAACACAGGTAAGTGCCGTGTGTGGT  
TCCCGCGGGCCTGGCCTCTTTACGGGTTATGGCCCTTGCCTGCCTTGAATTACTTCCACGC  
CCCTGGCTGCAGTACGTGATTCTTGATCCCGAGCTTCGGGTTGGAAGTGGGTGGGAGAG  
TTCGAGGCCTTGCCTTAAGGAGCCCCTTCGCCTCGTGCTTGAAGTTGAGGCCTGGCCTGG  
GCGCTGGGGCCGCCGCGTGCGAATCTGGTGGCACCTTCGCGCCTGTCTCGCTGCTTTTCG  
ATAAGTCTCTAGCCATTTAAAATTTTTGATGACCTGCTGCGACGCTTTTTTTCTGGCAAGA  
TAGTCTTGTAATGCGGGCCAAGATCTGCACACTGGTATTTTCGGTTTTTTGGGGCCGCGGG  
CGGCGACGGGGCCCGTGCCTCCAGCGCACATGTTTCGGCGAGGCGGGGCCTGCGAGCG  
CGGCCACCGAGAATCGGACGGGGGTAGTCTCAAGCTGGCCGGCCTGTCTGGTGCCTGG  
CCTCGCGCCGCCGTGTATCGCCCCGCCCTGGGCGGCAAGGCTGGCCCGGTTCGGCACAG  
TTGCGTGAGCGGAAAGATGGCCGCTTCCCGGCCCTGCTGCAGGGAGCTCAAATGGAGG  
ACGCGGCGCTCGGGAGAGCGGGCGGGTGAGTACCCACACAAAGGAAAAGGGCCTTTC  
CGTCTCAGCCGTCGCTTCATGTGACTCCACGGAGTACCGGGCGCCGTCCAGGCACCTC  
GATTAGTTCTCGAGCTTTTGGAGTACGTCTTTAGGTTGGGGGGAGGGGTTTTATGCG  
ATGGAGTTTCCCCACACTGAGTGGGTGGAGACTGAAGTTAGGCCAGCTTGGCACTTGAT  
GTAATTCTCCTTGAATTTGCCCTTTTTGAGTTTGGATCTTGGTTCATTCTCAAGCCTCAG  
ACAGTGGTTCAAAGTTTTTTTTCTTCCATTTAGGTGTCGTGAGAATTAGCCCGGGCCACC  
ATGACCGAGTACAAGCCCACGGTGCCTCGCCACCCGCGACGACGTCCCCGGGCCGT  
ACGCACCCTCGCCGCCGCTTCGCCGACTACCCCGCCACGCGCCACACCGTCGATCCGG  
ACCGCCACATCGAGCGGGTCACCGAGCTGCAAGAACTCTTCCTCACGCGCGTCGGGCTC  
GACATCGGCAAGGTGTGGGTTCGCGGACGACGGCGCCGCGGTGGCGGTCTGGACCACGC  
CGGAGAGCGTCGAAGCGGGGGCGGTGTTCCCGAGATCGGCCCGCGCATGGCCGAGTT  
GAGCGGTTCCCGGCTGGCCGCGCAGCAACAGATGGAAGGCCTCCTGGCGCCGCACCGG  
CCCAAGGAGCCCGCGTGGTTCCTGGCCACCGTCGGCGTCTCGCCCGACCACCAGGGCAA  
GGGTCTGGGCAGCGCCGTCGTGCTCCCCGAGTGGAGGCGGCCGAGCGCGCCGGGGTG  
CCCGCCTTCTGGAGACCTCCGCGCCCCGCAACCTCCCCTTCTACGAGCGGCTCGGCTTC  
ACCGTCACCGCCGACGTCGAGGTGCCCCGAAGGACCGCGCACCTGGTGCATGACCCGCA  
AGCCCGGTGCCTGAGATCCATTTAAGTTTAGTAGTAAAAGACTGGTTAATGATAACAATG  
CATCGTAAAACCTTCAGAAGGAAAGGAGAATGTTTTGTGGACCACTTTGGTTTTCTTTTT  
TGCGTGTGGCAGTTTTAAGTTATTAGTTTTTAAAATCAGTACTTTTTAATGGAAACAATT  
GACCAAAAATTTGTACAGAATTTTGGAGCCCATTAAAAAAGTTAAATGAGAAACCTGT  
GTGTTCCCTTGGTCAACACCGAGACACCTAGGATAACTTCGTATAATGTATGCTATAACGAA  
GTTATCACTAATTGCGTTGCGCGATGTTTTACATAATCCATCTATTTTTCTTGATCCATATGG  
AATTCGCGGCCGCcacgggattggaattctcatattctcaggtttctgtgtgtgtattaccaccatctgaataccctgectgcagaa  
aatgctgatgggactaatttaaatctgggataactatatttttaaaaagtctagaagcattatggtatcttccctacagcaaggctctctgaggtcacc

aagtgtgtccttagtaataagaattattactgtcttgaactttgcaagagcacgtgtccatagtccttagccccacagtcataccctagacattt  
agcggccagttattactgactgctaccagagtgatgaaggcagcagattctcttctgaaacaaccaaatgtaaccaaccattcataaaacag  
ctcaattacaggtctatgtcctcatgataggtttggttgaggctctttatagctcccagtaacatacaataaaggcttagctttaaaaattaaaaaa  
attaaaaaacacattagctgagcatgtagagcacgcttgggtcccagctacttgggaggctgaggcaggaggattgcttaaacccaggagtc  
cgaggcagcagtgagctgtgatcacaccactgcactccagcatgcgcaacagagcaagacaccatctcaaaaaaaaaaaaaaaaaagaagaaaa  
agaaaaagttaaaagaattattgcttttaagtgtgtagactaatgagctaggtttattgataccacaattagagcttaattattgaactgtgttcag  
agctatagttatagcattatagcccacaatgcctagtagcatcaattttatagtaaaggccaagatgagtcagaaaatcactttctgtgataacc  
tcacagtctaataaaggagataactgtaatacaggtgacaggtgttgaagagatttggagatgGGATCCAGTCGACTGAATTG  
GTTCCGGCGCCAGCCTGCTTTTTTGTACAAAGTTGGCATTATAAAAAAGCATTGCTTATCA  
ATTTGTTGCAACGAACAGGTCACTATCAGTCAAATAAAATCATTATTTGGGGCCCGAGC  
TTAAGTAACTAACTAACAGGAAGAGTTTGTAGAAACGCAAAAAGGCCATCCGTCAGGAT  
GGCCTTCTGCTTAGTTTGTATGCCTGGCAGTTTATGGCGGGCGTCCTGCCCGCCACCCTCC  
GGGCCGTTGCTTCACAACGTTCAAATCCGCTCCCGCGGATTTGTCCTACTCAGGAGAGC  
GTTACCCGACAAACAACAGATAAAACGAAAGGCCAGTCTTCCGACTGAGCCTTTCGTT  
TTATTTGATGCCTGGCAGTTCCTACTCTCGCTTAGTAGTTAGACGTCCCCGAGATCCATG  
CTAGCGGTAATACGGTTATCCACAGAATCAGGGGATAACGCAGGAAAG

### **CRISPR/Cas9 plasmid**

The plasmids expressing hSpCas9 and sgRNA were generated by ligating double-stranded oligos into the *Bbs*I site of pX330 (Addgene, no 42230, <http://www.addgene.org/42230/>). The sgRNA sequences are shown below.

**PEPT1 gRNA :** cagagccatgttaactgtgt

### **Genotyping primers and sequencing primers**

The sequences of genotyping primers are shown below.

**PEPT1 F:** 5'- agggaagaggctcagtatctacttc -3'

**PEPT1 R:** 5'- caagacagtaataattcttattcact -3'

The sequences of sequencing primer are shown below.

**PEPT1:** 5'- cccattgcaagtgtaaaatgca -3'
